# Supplementary material for: The impact of certolizumab pegol treatment on the incidence of anterior uveitis flares in patients with axial spondyloarthritis: 48-week interim results from C-VIEW
Source: PubMed Central journal article supplement — RMD Open. 2020 Apr 28;6(1):e001161. doi: 10.1136/rmdopen-2019-001161 (PMC7299504; doi:10.1136/rmdopen-2019-001161), 2020-04-28
Supplement: rmdopen-2019-001161s001.pdf [file rmdopen-2019-001161s001.pdf]

1 **SUPPLEMENTARY INFORMATION**

2

3 **Table S1.** Summary of screen failure reasons for ineligible patients (n=26)

4

| Inclusion/exclusion criteria                                                                                                                                                                          | Screen failure reason | Screen failures<br>n (%) <sup>a</sup> |
|-------------------------------------------------------------------------------------------------------------------------------------------------------------------------------------------------------|-----------------------|---------------------------------------|
| Patients must have active axSpA disease at screening as defined by BASDAI $\geq$ 4 and spinal pain $\geq$ 4 (from BASDAI item 2).                                                                     | Ineligibility         | 10 (38)                               |
| Patients must have a documented history of AAU diagnosed by an ophthalmologist and have at least 2 AAU flares in the past, of which at least 1 AAU flare was in the last 12 months prior to baseline. | Ineligibility         | 5 (19)                                |
| Patients must be HLA-B27 positive.                                                                                                                                                                    | Ineligibility         | 3 (12)                                |
| Patients must not have any other inflammatory arthritis.                                                                                                                                              | Ineligibility         | 1 (4)                                 |
| Patient has a condition that may interfere with the AAU assessment.                                                                                                                                   | Ineligibility         | 1 (4)                                 |
| Patient has received intraocular or periocular corticosteroids within 90 days prior to the baseline visit.                                                                                            | Ineligibility         | 3 (12)                                |
| Patients must not have used any forbidden co-medication as per protocol.                                                                                                                              | Ineligibility         | 1 (4)                                 |
| Patients have a history of chronic or recurrent infections, excluding uveitis.                                                                                                                        | Adverse event         | 1 (4)                                 |
| Patients have current acute or chronic viral hepatitis B or C, or human immunodeficiency virus infection.                                                                                             | Ineligibility         | 1 (4)                                 |
| Patients with current or history of active infection with histoplasma, coccidioides, para coccidioides, pneumocystis, nontuberculous mycobacteria, blastomyces, or aspergillus.                       | Ineligibility         | 1 (4)                                 |
| Patients with significant laboratory abnormalities.                                                                                                                                                   | Ineligibility         | 1 (4)                                 |

5 [a] The denominator is the total number of screen failures (n=26). Patients could have more than one reason for screen failure. AAU: acute anterior uveitis;  
 6 axSpA: axial spondyloarthritis; BASDAI: Bath Ankylosing Spondylitis Disease Activity Index.

7
